# Supplementary material
Source: PubMed Central journal article supplement (PMC6759016)
Supplement: supp_7.3.E582_2019-0052-1-at.pdf [file supp_7.3.E582_2019-0052-1-at.pdf]

## Appendix 1 (as supplied by the authors): Supplementary tables

### Supplementary Table S1. Description of Ontario health administrative data sources included in this study

| Database                                                            | Description                                                                                                                                                                                                                                                                                                                                                                                                                                                                                                                                                                                                                                                                                                                                                                        |
|---------------------------------------------------------------------|------------------------------------------------------------------------------------------------------------------------------------------------------------------------------------------------------------------------------------------------------------------------------------------------------------------------------------------------------------------------------------------------------------------------------------------------------------------------------------------------------------------------------------------------------------------------------------------------------------------------------------------------------------------------------------------------------------------------------------------------------------------------------------|
| Continuing Care Reporting System Long-Term Care (CCRS-LTC) database | The CCRS-LTC database is comprised of mandatory, clinical assessments performed on all nursing home residents in Ontario. Nursing home assessments are made using the Resident Assessment Instrument Minimum Data Set (RAI-MDS) version 2.0, a previously validated tool. <sup>1,2</sup> Full assessments are completed on admission, annually, and following a significant health status change by trained medical personnel.                                                                                                                                                                                                                                                                                                                                                     |
| Ontario Drug Benefit (ODB) program database                         | The ODB database contains prescription medication claims for those covered under the provincial drug program, mainly those aged 65 years and older, nursing home residents, and those receiving social assistance. Each medication claim has an associated prescriber identifier which indicates the health practitioner who wrote the prescription. A special flag in the ODB database indicates whether the prescription was dispensed in the community or nursing home setting.<br><br>An audit of 5,155 randomly selected prescriptions dispensed from 50 Ontario pharmacies determined that the ODB had an error rate of 0.7% and none of the pharmacy characteristics examined (locations, owner affiliation, productivity) were associated with coding errors. <sup>3</sup> |
| Registered Persons Database (RPDB)                                  | The RPDB provides basic demographic information (age, sex, area of residence, date of birth, and date of death for deceased individuals) about anyone who has ever received an Ontario health card number (e.g., been enrolled in the province's publicly funded health insurance system).                                                                                                                                                                                                                                                                                                                                                                                                                                                                                         |

#### References

1. Kim H, Jung YI, Sung M, Lee JY, Yoon JY, Yoon JL: Reliability of the interRAI Long Term Care Facilities (LTCF) and interRAI Home Care (HC). *Geriatr Gerontol Int* 2015; 15: 220-8
2. Mor V: A comprehensive clinical assessment tool to inform policy and practice: applications of the minimum data set. *Med Care* 2004; 42: III50-III59
3. Levy AR, O'Brien BJ, Sellors C, Grootendorst P, Willison D: Coding accuracy of administrative drug claims in the Ontario Drug Benefit database. *Can J Clin Pharmacol* 2003; 10: 67-71



|                                      |                          |                                                                        |
|--------------------------------------|--------------------------|------------------------------------------------------------------------|
| Morphine Sulfate                     | Long-acting              | 50mg<br>10mg<br>15mg<br>20mg<br>30mg<br>50mg<br>60mg<br>100mg<br>200mg |
| <b>Oxycodone</b>                     |                          |                                                                        |
| Oxycodone HCL                        | Short-acting             | 5mg<br>10mg<br>20mg                                                    |
| Oxycodone HCL + Acetaminophen        | Short-acting combination | 5mg                                                                    |
| Oxycodone HCL + Acetylsalicylic Acid | Short-acting combination | 5mg                                                                    |
| Oxycodone HCL                        | Long-acting              | 10mg<br>15mg<br>20mg<br>30mg<br>40mg<br>60mg<br>80mg                   |
| <b>Other</b>                         |                          |                                                                        |
| Meperidine HCL                       | Short-acting             | 50mg<br>75mg<br>100mg                                                  |
| Methadone HCL <sup>a</sup>           |                          | 1mg<br>5mg<br>10mg<br>25mg                                             |

---

Abbreviations: mg = milligrams; mcg/hr = micrograms per hour

a - Prescribed for pain purposes

**Supplementary Table S3. Morphine conversion ratios<sup>a</sup> used to express opioid prescriptions into milligrams of morphine equivalents (MMEs)**

| <b>Opioid medication</b> | <b>Morphine conversion ratio (Opioid : MME)</b>                                                                                                                                                                                    |
|--------------------------|------------------------------------------------------------------------------------------------------------------------------------------------------------------------------------------------------------------------------------|
| Codeine                  | 1mg : 0.15mg                                                                                                                                                                                                                       |
| Hydromorphone            | 1mg : 5mg                                                                                                                                                                                                                          |
| Morphine                 | 1mg : 1mg                                                                                                                                                                                                                          |
| Oxycodone                | 1mg : 1.5mg                                                                                                                                                                                                                        |
| Fentanyl <sup>b</sup>    | If 25 mcg/hr prescribed : 97mg<br>If 50 mcg/hr prescribed : 202mg<br>If 75 mcg/hr prescribed : 292mg<br>If 100 mcg/hr prescribed : 382mg                                                                                           |
| Meperidine               | 1mg : 0.1mg                                                                                                                                                                                                                        |
| Methadone <sup>c</sup>   | Dose conversions have not been reliably established and users for this medication would not receive a MME estimate. However, this medication comprised less than 0.1% of all opioid medications prescribed to the study population |

Abbreviations: mg = milligrams; mcg/hr = micrograms per hour; MME = Milligrams of Morphine Equivalents

a – Adapted from: National Opioid Use Guideline Group. *Canadian guidelines for safe and effective use of opioids for chronic non-cancer pain*. Hamilton, ON: McMaster University; 2010. Available: [http://nationalpaincentre.mcmaster.ca/opioid\\_2010/](http://nationalpaincentre.mcmaster.ca/opioid_2010/) (accessed 2017 December 15).

b – By using the days supplied and quantity field in ODB, we can estimate the length of time that an individual was wearing a fentanyl patch. This is calculated as the days supplied by the quantity field. If this value equals 2, we assume that the individual is using a patch for 2 days. In all other cases, we assume an individual is using a patch for 3 days.

c - Prescribed for pain purposes
