# Supplementary material
Source: PubMed Central journal article supplement (PMC6759016)
Supplement: supp_7.3.E582_2019-0052-original-submission.pdf [file supp_7.3.E582_2019-0052-original-submission.pdf]

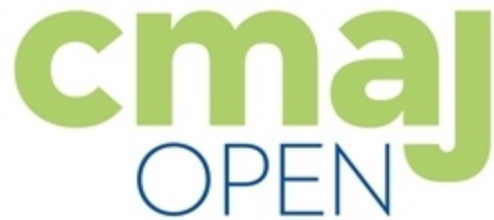

**Time trends in opioid prescribing among Ontario long-term care residents: a repeated cross-sectional study**

|                               |                                                                                                                                                                                                                                                                                                                                                                                                                                                                                                                                                                                                                                                                                                                                                                                                                                                                                                                                                                                                                                                                                                                                                                                                                                                               |
|-------------------------------|---------------------------------------------------------------------------------------------------------------------------------------------------------------------------------------------------------------------------------------------------------------------------------------------------------------------------------------------------------------------------------------------------------------------------------------------------------------------------------------------------------------------------------------------------------------------------------------------------------------------------------------------------------------------------------------------------------------------------------------------------------------------------------------------------------------------------------------------------------------------------------------------------------------------------------------------------------------------------------------------------------------------------------------------------------------------------------------------------------------------------------------------------------------------------------------------------------------------------------------------------------------|
| Journal:                      | <i>CMAJ Open</i>                                                                                                                                                                                                                                                                                                                                                                                                                                                                                                                                                                                                                                                                                                                                                                                                                                                                                                                                                                                                                                                                                                                                                                                                                                              |
| Manuscript ID                 | CMAJOpen-2019-0052                                                                                                                                                                                                                                                                                                                                                                                                                                                                                                                                                                                                                                                                                                                                                                                                                                                                                                                                                                                                                                                                                                                                                                                                                                            |
| Manuscript Type:              | Cross-sectional                                                                                                                                                                                                                                                                                                                                                                                                                                                                                                                                                                                                                                                                                                                                                                                                                                                                                                                                                                                                                                                                                                                                                                                                                                               |
| Date Submitted by the Author: | 03-Apr-2019                                                                                                                                                                                                                                                                                                                                                                                                                                                                                                                                                                                                                                                                                                                                                                                                                                                                                                                                                                                                                                                                                                                                                                                                                                                   |
| Complete List of Authors:     | Iaboni, Andrea; Toronto Rehabilitation Institute; University of Toronto Department of Psychiatry<br>Campitelli, Michael; Institute for Clinical Evaluative Sciences<br>Bronskill, Susan; Institute for Clinical Evaluative Sciences; University of Toronto Institute of Health Policy Management and Evaluation; Sunnybrook Research Institute; Women's College Hospital, Women's College Research Institute<br>Doing, Christina; Institute for Clinical Evaluative Sciences<br>Kumar, Matthew; Institute for Clinical Evaluative Sciences<br>Maclagan, Laura; Institute for Clinical Evaluative Sciences<br>Gomes, Tara; Institute for Clinical Evaluative Sciences; University of Toronto Institute of Health Policy Management and Evaluation; Li Ka Shing Knowledge Institute, St. Michael's Hospital; University of Toronto Leslie Dan Faculty of Pharmacy<br>Tadrous, Mina; Institute for Clinical Evaluative Sciences; Women's College Research Institute; Li Ka Shing Knowledge Institute, St. Michael's Hospital; University of Toronto Leslie Dan Faculty of Pharmacy<br>Maxwell, Colleen; University of Waterloo School of Public Health and Health Systems; Institute for Clinical Evaluative Sciences; University of Waterloo School of Pharmacy |
| More Detailed Keywords:       | Opioids, Pain, Long-term care, Nursing home, Dementia                                                                                                                                                                                                                                                                                                                                                                                                                                                                                                                                                                                                                                                                                                                                                                                                                                                                                                                                                                                                                                                                                                                                                                                                         |
| Keywords:                     | Pain, Geriatric medicine, Anesthesia and analgesia, Drugs and therapeutics                                                                                                                                                                                                                                                                                                                                                                                                                                                                                                                                                                                                                                                                                                                                                                                                                                                                                                                                                                                                                                                                                                                                                                                    |
| Abstract:                     | <p>Background: Opioids are an important pain therapy, but their use may be associated with adverse events in frail and cognitively impaired long-term care (LTC) residents. The objective of this study was to investigate trends in opioid prescribing among Ontario LTC residents over time, given the paucity of data for this setting.</p> <p>Methods: We used linked clinical and health administrative databases to conduct a population-based, repeated cross-sectional study of opioid use among Ontario LTC residents between April 1, 2009 and March 31, 2017. We identified prevalent opioid use by drug type, dose, and co-prescription with benzodiazepines and within certain subgroups including</p>                                                                                                                                                                                                                                                                                                                                                                                                                                                                                                                                           |

1  
2  
3  
4  
5  
6  
7  
8  
9  
10  
11  
12  
13  
14  
15  
16  
17  
18  
19  
20  
21  
22  
23  
24  
25  
26  
27  
28  
29  
30  
31  
32  
33  
34  
35  
36  
37  
38  
39  
40  
41  
42  
43  
44  
45  
46  
47  
48  
49  
50  
51  
52  
53  
54  
55  
56  
57  
58  
59  
60

|  |                                                                                                                                                                                                                                                                                                                                                                                                                                                                                                                                                                                                                                                                                                                                                                                                                                                                                                                                                                                                                                                                                                                                                                        |
|--|------------------------------------------------------------------------------------------------------------------------------------------------------------------------------------------------------------------------------------------------------------------------------------------------------------------------------------------------------------------------------------------------------------------------------------------------------------------------------------------------------------------------------------------------------------------------------------------------------------------------------------------------------------------------------------------------------------------------------------------------------------------------------------------------------------------------------------------------------------------------------------------------------------------------------------------------------------------------------------------------------------------------------------------------------------------------------------------------------------------------------------------------------------------------|
|  | <p>frail residents and those with dementia. Log-binomial regression was used to quantify the percentage change between the 2009/10 and 2016/17 fiscal years.</p> <p>Results: Among an average of 76,147 LTC residents per year, the prevalence of opioid use increased from 15.8% in 2009/10 to 19.6% in 2016/17 (<math>p&lt;0.001</math>). Over the study period, the use of hydromorphone increased by 235.6%, while use of all other opioid agents decreased. The use of high-dose opioids (&gt;90 milligrams of morphine equivalents) and the co-prescription of opioids with benzodiazepines decreased significantly by 17.4% (<math>p&lt;0.001</math>) and 23.6% (<math>p&lt;0.001</math>), respectively. Increases in opioid prevalence were more notable in frail residents (38.3% vs. 18.9% for non-frail; <math>p&lt;0.001</math>) and those with dementia (39.2% vs. 21.9% for no dementia; <math>p&lt;0.001</math>).</p> <p>Interpretation: Trends in opioid prescribing within Ontario LTC facilities demonstrate increasing use of opioids, particularly in frail and cognitively impaired residents, and a large shift towards using hydromorphone.</p> |
|  |                                                                                                                                                                                                                                                                                                                                                                                                                                                                                                                                                                                                                                                                                                                                                                                                                                                                                                                                                                                                                                                                                                                                                                        |

SCHOLARONE™  
Manuscripts

**The RECORD statement – checklist of items, extended from the STROBE statement, that should be reported in observational studies using routinely collected health data.**

|                           | Item No. | STROBE items                                                                                                                                                                               | Location in manuscript where items are reported                            | RECORD items                                                                                                                                                                                                                                                                                                                                                                                                                                | Location in manuscript where items are reported |
|---------------------------|----------|--------------------------------------------------------------------------------------------------------------------------------------------------------------------------------------------|----------------------------------------------------------------------------|---------------------------------------------------------------------------------------------------------------------------------------------------------------------------------------------------------------------------------------------------------------------------------------------------------------------------------------------------------------------------------------------------------------------------------------------|-------------------------------------------------|
| <b>Title and abstract</b> |          |                                                                                                                                                                                            |                                                                            |                                                                                                                                                                                                                                                                                                                                                                                                                                             |                                                 |
|                           | 1        | (a) Indicate the study's design with a commonly used term in the title or the abstract (b) Provide in the abstract an informative and balanced summary of what was done and what was found | See Title Page and Abstract section                                        | RECORD 1.1: The type of data used should be specified in the title or abstract. When possible, the name of the databases used should be included.<br><br>RECORD 1.2: If applicable, the geographic region and timeframe within which the study took place should be reported in the title or abstract.<br><br>RECORD 1.3: If linkage between databases was conducted for the study, this should be clearly stated in the title or abstract. | See Title Page and Abstract section             |
| <b>Introduction</b>       |          |                                                                                                                                                                                            |                                                                            |                                                                                                                                                                                                                                                                                                                                                                                                                                             |                                                 |
| Background rationale      | 2        | Explain the scientific background and rationale for the investigation being reported                                                                                                       | See Introduction section                                                   |                                                                                                                                                                                                                                                                                                                                                                                                                                             |                                                 |
| Objectives                | 3        | State specific objectives, including any prespecified hypotheses                                                                                                                           | See Introduction section (lines 145-148)                                   |                                                                                                                                                                                                                                                                                                                                                                                                                                             |                                                 |
| <b>Methods</b>            |          |                                                                                                                                                                                            |                                                                            |                                                                                                                                                                                                                                                                                                                                                                                                                                             |                                                 |
| Study Design              | 4        | Present key elements of study design early in the paper                                                                                                                                    | See 'Study Design, Setting, and Data' portion of the Methods section.      |                                                                                                                                                                                                                                                                                                                                                                                                                                             |                                                 |
| Setting                   | 5        | Describe the setting, locations, and relevant dates, including periods of recruitment, exposure, follow-up, and data collection                                                            | See Methods section, mainly the 'Study Design, Setting, and Data' portion. |                                                                                                                                                                                                                                                                                                                                                                                                                                             |                                                 |

|                                                                                                                                                                                                            |          |                                                                                                                                                                                                                                                                                                                                                                                                                                                                                                                                                                                                                                                                                                                        |                                                                                             |                                                                                                                                                                                                                                                                                                                                                                                                                                                                                                                                                                                                                                                                                                      |                                                                                                |
|------------------------------------------------------------------------------------------------------------------------------------------------------------------------------------------------------------|----------|------------------------------------------------------------------------------------------------------------------------------------------------------------------------------------------------------------------------------------------------------------------------------------------------------------------------------------------------------------------------------------------------------------------------------------------------------------------------------------------------------------------------------------------------------------------------------------------------------------------------------------------------------------------------------------------------------------------------|---------------------------------------------------------------------------------------------|------------------------------------------------------------------------------------------------------------------------------------------------------------------------------------------------------------------------------------------------------------------------------------------------------------------------------------------------------------------------------------------------------------------------------------------------------------------------------------------------------------------------------------------------------------------------------------------------------------------------------------------------------------------------------------------------------|------------------------------------------------------------------------------------------------|
| <p>1<br/>2<br/>3<br/>4<br/>5<br/>6<br/>7<br/>8<br/>9<br/>10<br/>11<br/>12<br/>13<br/>14<br/>15<br/>16<br/>17<br/>18<br/>19<br/>20<br/>21<br/>22<br/>23<br/>24<br/>25<br/>26<br/>27</p> <p>Participants</p> | <p>6</p> | <p>(a) <i>Cohort study</i> - Give the eligibility criteria, and the sources and methods of selection of participants. Describe methods of follow-up<br/> <i>Case-control study</i> - Give the eligibility criteria, and the sources and methods of case ascertainment and control selection. Give the rationale for the choice of cases and controls<br/> <i>Cross-sectional study</i> - Give the eligibility criteria, and the sources and methods of selection of participants</p> <p>(b) <i>Cohort study</i> - For matched studies, give matching criteria and number of exposed and unexposed<br/> <i>Case-control study</i> - For matched studies, give matching criteria and the number of controls per case</p> | <p>a) See ‘Study Population’ portion of the Methods section.</p> <p>b) Not applicable.</p>  | <p>RECORD 6.1: The methods of study population selection (such as codes or algorithms used to identify subjects) should be listed in detail. If this is not possible, an explanation should be provided.</p> <p>RECORD 6.2: Any validation studies of the codes or algorithms used to select the population should be referenced. If validation was conducted for this study and not published elsewhere, detailed methods and results should be provided.</p> <p>RECORD 6.3: If the study involved linkage of databases, consider use of a flow diagram or other graphical display to demonstrate the data linkage process, including the number of individuals with linked data at each stage.</p> | <p>See ‘Study Population’ portion of the Methods section for 6.1, 6.2, and 6.3.</p>            |
| <p>28<br/>29<br/>30<br/>31<br/>32<br/>33<br/>34<br/>35</p> <p>Variables</p>                                                                                                                                | <p>7</p> | <p>Clearly define all outcomes, exposures, predictors, potential confounders, and effect modifiers. Give diagnostic criteria, if applicable.</p>                                                                                                                                                                                                                                                                                                                                                                                                                                                                                                                                                                       | <p>See ‘Medication Use’ and ‘Resident Characteristics’ portions of the Methods Section.</p> | <p>RECORD 7.1: A complete list of codes and algorithms used to classify exposures, outcomes, confounders, and effect modifiers should be provided. If these cannot be reported, an explanation should be provided.</p>                                                                                                                                                                                                                                                                                                                                                                                                                                                                               | <p>See ‘Online Supplement, eTable 2’ for a complete list of opioid medications considered.</p> |
| <p>36<br/>37<br/>38<br/>39<br/>40<br/>41<br/>42<br/>43</p> <p>Data sources/<br/>measurement</p>                                                                                                            | <p>8</p> | <p>For each variable of interest, give sources of data and details of methods of assessment (measurement). Describe comparability of assessment methods if there is more than one group</p>                                                                                                                                                                                                                                                                                                                                                                                                                                                                                                                            | <p>See ‘Medication Use’ and ‘Resident Characteristics’ portions of the Methods Section.</p> |                                                                                                                                                                                                                                                                                                                                                                                                                                                                                                                                                                                                                                                                                                      |                                                                                                |

|                                                                                                                                              |                                  |    |                                                                                                                                                                                                                                                                                                                                                                                                                                                                                                                                                                      |                                                                                                                                                                                                                                                                                                         |                                                                                                                                                                                                  |
|----------------------------------------------------------------------------------------------------------------------------------------------|----------------------------------|----|----------------------------------------------------------------------------------------------------------------------------------------------------------------------------------------------------------------------------------------------------------------------------------------------------------------------------------------------------------------------------------------------------------------------------------------------------------------------------------------------------------------------------------------------------------------------|---------------------------------------------------------------------------------------------------------------------------------------------------------------------------------------------------------------------------------------------------------------------------------------------------------|--------------------------------------------------------------------------------------------------------------------------------------------------------------------------------------------------|
| 1<br>2<br>3                                                                                                                                  | Bias                             | 9  | Describe any efforts to address potential sources of bias                                                                                                                                                                                                                                                                                                                                                                                                                                                                                                            | See ‘Statistical Analysis’ portion of the Methods section.                                                                                                                                                                                                                                              |                                                                                                                                                                                                  |
| 4<br>5                                                                                                                                       | Study size                       | 10 | Explain how the study size was arrived at                                                                                                                                                                                                                                                                                                                                                                                                                                                                                                                            | Not applicable.                                                                                                                                                                                                                                                                                         |                                                                                                                                                                                                  |
| 6<br>7<br>8<br>9<br>10<br>11                                                                                                                 | Quantitative variables           | 11 | Explain how quantitative variables were handled in the analyses. If applicable, describe which groupings were chosen, and why                                                                                                                                                                                                                                                                                                                                                                                                                                        | See ‘Statistical Analysis’ portion of the Methods section.                                                                                                                                                                                                                                              |                                                                                                                                                                                                  |
| 12<br>13<br>14<br>15<br>16<br>17<br>18<br>19<br>20<br>21<br>22<br>23<br>24<br>25<br>26<br>27<br>28<br>29<br>30<br>31<br>32<br>33<br>34<br>35 | Statistical methods              | 12 | (a) Describe all statistical methods, including those used to control for confounding<br>(b) Describe any methods used to examine subgroups and interactions<br>(c) Explain how missing data were addressed<br>(d) <i>Cohort study</i> - If applicable, explain how loss to follow-up was addressed<br><i>Case-control study</i> - If applicable, explain how matching of cases and controls was addressed<br><i>Cross-sectional study</i> - If applicable, describe analytical methods taking account of sampling strategy<br>(e) Describe any sensitivity analyses | See ‘Statistical Analysis’ portion of the Methods section for a) and b).<br><br>c) There were no missing data in the study to address.<br><br>d) Our cross-sectional study design included all LTC residents in a given study year and did not employ a sampling strategy to select study participants. |                                                                                                                                                                                                  |
| 36<br>37<br>38<br>39<br>40<br>41<br>42<br>43<br>44                                                                                           | Data access and cleaning methods |    | ..                                                                                                                                                                                                                                                                                                                                                                                                                                                                                                                                                                   |                                                                                                                                                                                                                                                                                                         | RECORD 12.1: Authors should describe the extent to which the investigators had access to the database population used to create the study population.<br><br>RECORD 12.2: Authors should provide |
| 45<br>46<br>47                                                                                                                               |                                  |    |                                                                                                                                                                                                                                                                                                                                                                                                                                                                                                                                                                      |                                                                                                                                                                                                                                                                                                         | See ‘Author contributions’ portion of the Acknowledgements section of 12.1.<br><br>Not applicable –                                                                                              |

|                  |    |                                                                                                                                                                                                                                                                                                                                                 |                                                                                                                                                    |                                                                                                                                                                                                                                                                                                                    |                                                                                |
|------------------|----|-------------------------------------------------------------------------------------------------------------------------------------------------------------------------------------------------------------------------------------------------------------------------------------------------------------------------------------------------|----------------------------------------------------------------------------------------------------------------------------------------------------|--------------------------------------------------------------------------------------------------------------------------------------------------------------------------------------------------------------------------------------------------------------------------------------------------------------------|--------------------------------------------------------------------------------|
|                  |    |                                                                                                                                                                                                                                                                                                                                                 |                                                                                                                                                    | information on the data cleaning methods used in the study.                                                                                                                                                                                                                                                        | 12.2                                                                           |
| Linkage          |    | ..                                                                                                                                                                                                                                                                                                                                              |                                                                                                                                                    | RECORD 12.3: State whether the study included person-level, institutional-level, or other data linkage across two or more databases. The methods of linkage and methods of linkage quality evaluation should be provided.                                                                                          | See ‘Study Design, Setting, and Data’ portion of the Methods section for 12.3. |
| <b>Results</b>   |    |                                                                                                                                                                                                                                                                                                                                                 |                                                                                                                                                    |                                                                                                                                                                                                                                                                                                                    |                                                                                |
| Participants     | 13 | (a) Report the numbers of individuals at each stage of the study ( <i>e.g.</i> , numbers potentially eligible, examined for eligibility, confirmed eligible, included in the study, completing follow-up, and analysed)<br>(b) Give reasons for non-participation at each stage.<br>(c) Consider use of a flow diagram                          | See ‘Study Population’ portion of the Methods section (lines 165-175) for a).<br><br>See ‘Study Population’ portion of the Methods section for b). | RECORD 13.1: Describe in detail the selection of the persons included in the study ( <i>i.e.</i> , study population selection) including filtering based on data quality, data availability and linkage. The selection of included persons can be described in the text and/or by means of the study flow diagram. | See ‘Study Population’ portion of the Methods section.                         |
| Descriptive data | 14 | (a) Give characteristics of study participants ( <i>e.g.</i> , demographic, clinical, social) and information on exposures and potential confounders<br>(b) Indicate the number of participants with missing data for each variable of interest<br>(c) <i>Cohort study</i> - summarise follow-up time ( <i>e.g.</i> , average and total amount) | See ‘Online Supplement, eTable 3’ for a).<br><br>No missing data for b).<br><br>c) Study was cross-sectional and there was no follow-up time.      |                                                                                                                                                                                                                                                                                                                    |                                                                                |
| Outcome data     | 15 | <i>Cohort study</i> - Report numbers of outcome events or summary measures over time<br><i>Case-control study</i> - Report numbers in each exposure category, or summary measures of exposure                                                                                                                                                   | See Results section.                                                                                                                               |                                                                                                                                                                                                                                                                                                                    |                                                                                |

|                                                                                                       |                   |                                                                                     |                                                                                                                                                                                                                                                                                                                                                                                                                 |                                                            |                                                                                                                                                                                                                                                                                                          |
|-------------------------------------------------------------------------------------------------------|-------------------|-------------------------------------------------------------------------------------|-----------------------------------------------------------------------------------------------------------------------------------------------------------------------------------------------------------------------------------------------------------------------------------------------------------------------------------------------------------------------------------------------------------------|------------------------------------------------------------|----------------------------------------------------------------------------------------------------------------------------------------------------------------------------------------------------------------------------------------------------------------------------------------------------------|
|                                                                                                       |                   | <i>Cross-sectional study</i> - Report numbers of outcome events or summary measures |                                                                                                                                                                                                                                                                                                                                                                                                                 |                                                            |                                                                                                                                                                                                                                                                                                          |
| 1<br>2<br>3<br>4<br>5<br>6<br>7<br>8<br>9<br>10<br>11<br>12<br>13<br>14<br>15<br>16<br>17<br>18<br>19 | Main results      | 16                                                                                  | (a) Give unadjusted estimates and, if applicable, confounder-adjusted estimates and their precision (e.g., 95% confidence interval). Make clear which confounders were adjusted for and why they were included<br>(b) Report category boundaries when continuous variables were categorized<br>(c) If relevant, consider translating estimates of relative risk into absolute risk for a meaningful time period | See Results section and Tables 1 and 2 for a), b), and c). |                                                                                                                                                                                                                                                                                                          |
| 20<br>21<br>22<br>23<br>24                                                                            | Other analyses    | 17                                                                                  | Report other analyses done—e.g., analyses of subgroups and interactions, and sensitivity analyses                                                                                                                                                                                                                                                                                                               | See Results section and Table 2.                           |                                                                                                                                                                                                                                                                                                          |
| 25                                                                                                    | <b>Discussion</b> |                                                                                     |                                                                                                                                                                                                                                                                                                                                                                                                                 |                                                            |                                                                                                                                                                                                                                                                                                          |
| 26<br>27                                                                                              | Key results       | 18                                                                                  | Summarise key results with reference to study objectives                                                                                                                                                                                                                                                                                                                                                        | See Interpretation section.                                |                                                                                                                                                                                                                                                                                                          |
| 28<br>29<br>30<br>31<br>32<br>33<br>34<br>35<br>36                                                    | Limitations       | 19                                                                                  | Discuss limitations of the study, taking into account sources of potential bias or imprecision. Discuss both direction and magnitude of any potential bias                                                                                                                                                                                                                                                      | See limitations portion of the Interpretation section.     | RECORD 19.1: Discuss the implications of using data that were not created or collected to answer the specific research question(s). Include discussion of misclassification bias, unmeasured confounding, missing data, and changing eligibility over time, as they pertain to the study being reported. |
| 37<br>38<br>39<br>40<br>41<br>42<br>43<br>44                                                          | Interpretation    | 20                                                                                  | Give a cautious overall interpretation of results considering objectives, limitations, multiplicity of analyses, results from similar studies, and other relevant                                                                                                                                                                                                                                               | See Interpretation section.                                |                                                                                                                                                                                                                                                                                                          |

|                                              |                                                           |          |                                                                                                                                                               |                                                                                                                                                          |                                                               |
|----------------------------------------------|-----------------------------------------------------------|----------|---------------------------------------------------------------------------------------------------------------------------------------------------------------|----------------------------------------------------------------------------------------------------------------------------------------------------------|---------------------------------------------------------------|
|                                              |                                                           | evidence |                                                                                                                                                               |                                                                                                                                                          |                                                               |
| 1<br>2<br>3<br>4<br>5<br>6<br>7<br>8<br>9    | Generalisability                                          | 21       | Discuss the generalisability (external validity) of the study results                                                                                         | Given the cross-sectional nature of the study and its population-based nature, there are minimal impacts to external validity.                           |                                                               |
| 10                                           | <b>Other Information</b>                                  |          |                                                                                                                                                               |                                                                                                                                                          |                                                               |
| 11<br>12<br>13<br>14<br>15<br>16<br>17<br>18 | Funding                                                   | 22       | Give the source of funding and the role of the funders for the present study and, if applicable, for the original study on which the present article is based | See 'Funding' and 'Sponsor's Role' portion of the Acknowledgements section on the manuscript title page(s).                                              |                                                               |
| 19<br>20<br>21<br>22<br>23<br>24             | Accessibility of protocol, raw data, and programming code |          | ..                                                                                                                                                            | RECORD 22.1: Authors should provide information on how to access any supplemental information such as the study protocol, raw data, or programming code. | See Acknowledgements section on the manuscript title page(s). |

\*Reference: Benchimol EI, Smeeth L, Guttman A, Harron K, Moher D, Petersen I, Sørensen HT, von Elm E, Langan SM, the RECORD Working Committee. The REporting of studies Conducted using Observational Routinely-collected health Data (RECORD) Statement. *PLoS Medicine* 2015; in press.

\*Checklist is protected under Creative Commons Attribution ([CC BY](https://creativecommons.org/licenses/by/4.0/)) license.



1  
2  
3 1 **Time trends in opioid prescribing among Ontario long-term care residents: a repeated**  
4 2 **cross-sectional study**  
5  
6 3

7 4 Andrea Iaboni MD, DPhil<sup>1,2</sup>, Michael A. Campitelli MPH<sup>3</sup>, Susan E. Bronskill PhD<sup>3,4,5,6</sup>, Christina  
8 5 Diong MSc<sup>3</sup>, Matthew Kumar MSc<sup>3</sup>, Laura C. Maclagan MSc<sup>3</sup>, Tara Gomes PhD<sup>3,4,7,8</sup>, Mina Tadrous  
9 6 PharmD, PhD<sup>3,6,7,8</sup>, Colleen J. Maxwell PhD<sup>3,9,10</sup>  
10

11 7  
12 8 1 Toronto Rehabilitation Institute, University Health Network, Toronto, Ontario, Canada

13 9 2 Department of Psychiatry, University of Toronto, Toronto, Ontario, Canada

14 10 3 ICES, Toronto, Ontario, Canada

15 11 4 Institute of Health Policy, Management & Evaluation, University of Toronto, Toronto, Ontario, Canada

16 12 5 Sunnybrook Research Institute, Sunnybrook Health Sciences Centre, Toronto, Ontario, Canada

17 13 6 Women's College Research Institute, Women's College Hospital, Toronto, Ontario, Canada

18 14 7 Li Ka Shing Knowledge Institute, St. Michael's Hospital, Toronto, Ontario, Canada

19 15 8 Leslie Dan Faculty of Pharmacy, University of Toronto, Toronto, Ontario, Canada

20 16 9 School of Pharmacy, University of Waterloo, Waterloo, Ontario, Canada

21 17 10 School of Public Health and Health Systems, University of Waterloo, Waterloo, Ontario, Canada  
22  
23  
24  
25

26 24 **Abstract Word Count:** 247 (max 250)

27 25 **Text Word Count:** 2,500 (max 2,500)

28 26 **Number of Tables/Figures:** 4

29 27 **Number of References:** 40  
30  
31

32 29 **Running Title:** Opioid prescribing trends in long-term care

33 30 **Keywords:** Opioids, pain, long-term care, nursing home, dementia  
34  
35  
36  
37  
38  
39  
40  
41  
42  
43

44 38 **CORRESPONDING AUTHOR**

45 39 Colleen J. Maxwell

46 40 School of Pharmacy, University of Waterloo

47 41 200 University Avenue West,

48 42 Waterloo, Ontario, Canada

49 43 N2L 3G1

50 44 Phone: 519-888-4567 ex.21396

51 45 E-mail: colleen.maxwell@uwaterloo.ca

52 46 This e-mail address may be published.  
53  
54  
55  
56  
57  
58  
59  
60

1  
2  
3  
4  
5  
6  
7  
8  
9  
10  
11  
12  
13  
14  
15  
16  
17  
18  
19  
20  
21  
22  
23  
24  
25  
26  
27  
28  
29  
30  
31  
32  
33  
34  
35  
36  
37  
38  
39  
40  
41  
42  
43  
44  
45  
46  
47  
48  
49  
50  
51  
52  
53  
54  
55  
56  
57  
58  
59  
60

**Funding:** This research was funded in part by the Canadian Institutes of Health Research (CIHR) through an operating grant (Exploring frailty and its role in the assessment of high risk medications and risk of poor health outcomes in vulnerable populations – MOP-136854). This study was also supported by ICES, which is funded by an annual grant from the Ontario Ministry of Health and Long-Term Care (MOHLTC). The opinions, results and conclusions reported are those of the authors and are independent from the funding sources. No endorsement by ICES or the Ontario MOHLTC is intended or should be inferred. Parts of this material are based on data and information compiled and provided by the Canadian Institute for Health Information (CIHI). However, the analyses, conclusions, opinions and statements expressed herein are those of the author, and not necessarily those of CIHI.

**Acknowledgements:** We thank IMS Brogan Inc. for use of their Drug Information Database. Please contact the authors for any supplemental information related to the study such as the study protocol, analysis plan, or analytic code.

**Conflict of Interest:** The authors have no conflicts of interest to declare.

**Author Contributions:** AI, MC, SB, and CM conceived and designed the study. MC, CD, and MK carried out the statistical analysis. AI, MC, SB, and CM drafted the manuscript. All authors contributed to the interpretation of data and critical revisions of the manuscript for important intellectual content. MC and SB had full access to the study databases and are the guarantors of the study.

**Sponsor's role:** The study sponsors provided the operating costs and infrastructure to support the research. No funding bodies had any role in the study design, data collection, analysis, decision to publish, or preparation of the manuscript.

1  
2  
3 87 **ABSTRACT**  
4  
5 88

6 89 **Background:** Opioids are an important pain therapy, but their use may be associated with adverse  
7  
8 90 events in frail and cognitively impaired long-term care (LTC) residents. The objective of this study  
9  
10 91 was to investigate trends in opioid prescribing among Ontario LTC residents over time, given the  
11  
12 92 paucity of data for this setting.  
13  
14 93

15 94 **Methods:** We used linked clinical and health administrative databases to conduct a population-  
16  
17 95 based, repeated cross-sectional study of opioid use among Ontario LTC residents between April 1,  
18  
19 96 2009 and March 31, 2017. We identified prevalent opioid use by drug type, dose, and co-prescription  
20  
21 97 with benzodiazepines and within certain subgroups including frail residents and those with  
22  
23 98 dementia. Log-binomial regression was used to quantify the percentage change between the 2009/10  
24  
25 99 and 2016/17 fiscal years.  
26  
27 100

28 101 **Results:** Among an average of 76,147 LTC residents per year, the prevalence of opioid use  
29  
30 102 increased from 15.8% in 2009/10 to 19.6% in 2016/17 ( $p<0.001$ ). Over the study period, the use of  
31  
32 103 hydromorphone increased by 235.6%, while use of all other opioid agents decreased. The use of  
33  
34 104 high-dose opioids ( $>90$  milligrams of morphine equivalents) and the co-prescription of opioids with  
35  
36 105 benzodiazepines decreased significantly by 17.4% ( $p<0.001$ ) and 23.6% ( $p<0.001$ ), respectively.  
37  
38 106 Increases in opioid prevalence were more notable in frail residents (38.3% vs. 18.9% for non-frail;  
39  
40 107  $p<0.001$ ) and those with dementia (39.2% vs. 21.9% for no dementia;  $p<0.001$ ).  
41  
42 108

43 109 **Interpretation:** Trends in opioid prescribing within Ontario LTC facilities demonstrate increasing  
44  
45 110 use of opioids, particularly in frail and cognitively impaired residents, and a large shift towards using  
46  
47 111 hydromorphone.  
48  
49 112  
50 113  
51 114  
52 115

## 116 INTRODUCTION

117 Prescribers of opioid medications in long-term care (LTC) settings face difficulties balancing  
118 appropriate pain management with the potential risks of these therapies in vulnerable older adults.

119 While pain is highly prevalent among LTC residents,(1, 2) reliable pain assessment in LTC is  
120 clinically challenging, particularly in those with dementia who may have trouble expressing their pain  
121 management needs.(3) As a result, poor recognition and under-treatment of pain in individuals with  
122 cognitive impairment in LTC settings is a well-described phenomenon.(4, 5)

123 While under-treatment of pain is one concern, the use of opioids in older adults is also  
124 associated with side effects and adverse events.(6) Pharmacokinetic changes, such as age-related  
125 decline in renal function and drug metabolism, place older adults at increased risk of sedation or  
126 opioid overdose.(6) Older adults are also more vulnerable to events such as falls (7) and respiratory  
127 depression.(8) Furthermore, polypharmacy is common in the LTC population, increasing the risk of  
128 exposure to clinically significant drug interactions, including the concurrent use of opioids with  
129 benzodiazepines which is associated with an elevated risk of overdose and death.(9, 10)

130 Nonetheless, opioids are an important intervention for the pharmacologic management of  
131 moderate to severe pain in older adults,(11) with 22% of all older adults in Ontario prescribed an  
132 opioid.(12) Prescribers have a number of choices about opioid treatment, including the selection of  
133 the agent, duration of action, and dosing.(6) Internationally, there is considerable variation in opioid  
134 prescribing patterns in LTC, both in terms of drug selection and dosing, although recent trends  
135 indicate increased opioid use in LTC, particularly in people with dementia.(13)

136 In response to wider concerns around opioid use in the community, there have been a  
137 number of initiatives over the past decade focused on improving pain assessment and treatment, and  
138 on providing guidelines for appropriate and safer opioid prescribing.(11, 14-17) Recent Canadian  
139 guidelines for the management of chronic non-cancer pain recommend avoiding escalation of daily  
140 doses above 90 milligrams of morphine equivalents (MME), and avoiding co-prescription of opioids  
141 with benzodiazepines.(16) Furthermore, the 2011 Ontario Narcotics Safety Awareness Act increased  
142 the surveillance of prescription opioids by introducing a provincial prescription monitoring program  
143 for community prescribers.(18) To date, Canadian guidelines have not directly addressed the unique  
144 and clinically challenging issues facing opioid prescribing in LTC.

145 In an era when opioid use is highly scrutinized in other populations, it is unclear whether  
146 these guidelines or legislative changes have had an impact on the opioid prescribing habits of LTC

1  
2  
3 147 physicians. Towards addressing the sparseness of data in this area, we examined trends over time in  
4  
5 148 the prescribing of opioids for LTC residents in Ontario.

6  
7 149

## 8 150 **METHODS**

### 9 10 151 **Study Design, Setting, and Data**

11  
12 152 We conducted a population-based, repeated cross-sectional study of opioid use among LTC  
13  
14 153 residents from Ontario, Canada between April 1, 2009 and March 31, 2017. The study used clinical  
15  
16 154 and health administrative databases which were linked using unique encoded identifiers and analyzed  
17  
18 155 at ICES (see **eTable 1** for a description of the databases). These databases have been used  
19  
20 156 extensively to study medication use in the LTC setting.(19-22) In Ontario, the majority of the cost of  
21  
22 157 LTC is covered by the publicly-funded provincial health system. Additionally, all residents have  
23  
24 158 universal access to prescription medications, physician services, and hospital care. The study used  
25  
26 159 data authorized under section 45 of Ontario's Personal Health Information Protection Act, which  
27  
28 160 does not require review by a Research Ethics Board.

### 27 161 **Study Population**

28  
29 162 The Continuing Care Reporting System LTC database includes clinical assessment data on  
30  
31 163 all residents collected using the validated Resident Assessment Instrument Minimum Data Set  
32  
33 164 version 2.0 (RAI-MDS 2.0) tool.(23) Mandatory full clinical assessments are completed on LTC  
34  
35 165 admission, annually, and following any significant health status change. We identified all 1,030,310  
36  
37 166 full clinical assessments with the RAI-MDS 2.0 during our study period among residents aged 66  
38  
39 167 years and older. Assessments where the resident had no medication claims in the past year  
40  
41 168 (N=8,399; 0.82%), had used palliative care services in the inpatient or outpatient setting in the past 6  
42  
43 169 months (N=42,986; 4.17%), or had a concurrent diagnosis of cancer noted in the RAI-MDS 2.0  
44  
45 170 (N=89,751; 8.71%) were excluded. As the use of opioids in palliative care and cancer pain are clearly  
46  
47 171 indicated, our study focused on non-cancer and non-palliative LTC residents. The remaining  
48  
49 172 889,174 assessments were grouped into study years (from April 1 to the following March 31 to align  
50  
51 173 with provincial data reporting cycles) and we selected one assessment per resident for each year,  
52  
53 174 giving preference to the earliest assessment. The final study population comprised 609,177 residents  
54  
55 175 across eight study years.

### 52 176 **Medication use**

54 177 We used the Ontario Drug Benefit (ODB) database to ascertain all opioid and  
55  
56 178 benzodiazepine drug claims whereby a course of therapy (estimated using the date dispensed plus

1  
2  
3 179 days supplied) overlapped or included the RAI-MDS 2.0 assessment date. An assessment could have  
4  
5 180 had multiple opioid claims meeting this definition. A list of all opioid medications included can be  
6  
7 181 found in **eTable 2**. We used previously described methods to compute the combined total daily  
8  
9 182 dose in MMEs for all opioid prescriptions at assessment date.(24)

10 183 Measures captured at each assessment date included the proportion of residents prescribed  
11  
12 184 any opioid, as well as the proportion receiving specific opioid agents (codeine, hydromorphone,  
13  
14 185 morphine, fentanyl, and oxycodone), different formulations (long-acting and short-acting), a total  
15  
16 186 daily dose greater than 90 MMEs, and opioids co-prescribed with benzodiazepines.

### 17 187 **Resident Characteristics**

18 188 Age and sex at assessment date was determined using the Ontario Registered Persons  
19  
20 189 database. The RAI-MDS 2.0 data were used to identify assessments with a concurrent diagnosis of  
21  
22 190 Alzheimer's disease or other dementia.(25) Assessment items from the RAI-MDS 2.0 were also used  
23  
24 191 to compute a validated measure of resident frailty,(26, 27) which included 72 deficits covering  
25  
26 192 multiple domains of health (disease diagnoses, functional status, psychosocial well-being, cognition,  
27  
28 193 and communication). In accordance with previous work,(26-28) residents with greater than 30% of  
29  
30 194 potential deficits were defined as frail. A measure of pain frequency in the RAI-MDS 2.0 was used  
31  
32 195 to identify residents experiencing daily pain, less than daily pain, or no pain in the 7 days prior to  
33  
34 196 assessment. Finally, the RAI-MDS 2.0 was used to distinguish full assessments performed upon  
35  
36 197 entry to LTC versus on-going full assessments (occurring annually or after significant health status  
37  
38 198 changes) thereafter.

### 37 199 **Statistical Analysis**

38 200 To summarize any changes that occurred over the eight year study period, we compared the  
39  
40 201 patterns of each opioid dispensing measure between the first (2009/10) and last (2016/17) study  
41  
42 202 year using log-binomial regression models to calculate the percentage change. Adjusted models  
43  
44 203 included age, sex, dementia diagnosis, frailty, and LTC assessment type to control for any changes in  
45  
46 204 the LTC population across the study period. Pain frequency was not included in the adjusted models  
47  
48 205 as pain may have been modified by opioid use. As individuals could have been included in multiple  
49  
50 206 study years, we used generalized estimating equations to account for the correlated nature of the  
51  
52 207 data.(29)

52 208 For the annual measure of the proportion of residents receiving any opioid at assessment  
53  
54 209 date, we stratified the above analyses by age ( $\leq 85$  years vs.  $> 85$  years), sex, dementia diagnosis,

1  
2  
3 210 resident frailty, pain frequency at assessment (any pain vs. no pain), and LTC assessment type (entry  
4  
5 211 vs. on-going assessment) and ran interaction tests to assess for any effect modification.

6 212 Analyses were conducted using SAS version 9.4 (SAS Institute Inc.). All statistical tests were  
7  
8 213 2-tailed and we defined  $p < 0.05$  as the level of statistical significance.  
9

10 214

## 11 215 **RESULTS**

### 12 216 **Trends in opioid prescribing**

13  
14  
15 217 Our study population comprised an average of 76,147 LTC residents per study year (see  
16  
17 218 **eTable 3** for resident characteristics at each year). The prevalence of any opioid prescription in LTC  
18  
19 219 increased from 15.8% in 2009/10 to 19.6% in 2016/17 (**Figure 1**), a significant 23.8% increase ( $p$ -  
20  
21 220 value  $< 0.001$ ) in opioid prevalence over the eight year period (**Table 1**). After adjusting for age, sex,  
22  
23 221 frailty status, dementia diagnosis, and LTC assessment type (entry vs. on-going), this represented a  
24  
25 222 30.3% increase in opioid prevalence during the study period. After adjustment, the use of most  
26  
27 223 opioid agents decreased over this time frame, including a 26.1% reduction in codeine, a 39.8%  
28  
29 224 reduction in fentanyl, and a 36.8% reduction in oxycodone. However, there was a coinciding 235.6%  
30  
31 225 increase (from 3.7% in 2009/10 to 11.8% in 2016/17) in hydromorphone prescribing. While the use  
32  
33 226 of both opioid formulations increased significantly, the increase was larger for short-acting  
34  
35 227 formulations (42.4% increase vs. a 13.1% increase for long-acting formulations).

### 33 228 **Trends in safer opioid prescribing**

35 229 The overall, adjusted use of high-dose opioids (total daily dose  $> 90$  MME) decreased  
36  
37 230 significantly by 17.4% ( $p$ -value  $< 0.001$ ), from a prevalence in all residents of 4.8% in 2009/10 to  
38  
39 231 3.6% in 2016/17 (**Table 1**). Among opioid users in 2016/17, 18.3% of residents had a total daily  
40  
41 232 dose  $> 90$  MME (vs. 30.2% in 2009/10), while 70.5% had a total daily dose  $< 50$  MME (vs. 60.3% in  
42  
43 233 2009/10).

44 234 The proportion of all residents co-prescribed opioids and benzodiazepines decreased from  
45  
46 235 4.8% in 2009/10 to 3.4% in 2016/17, a significant 23.6% reduction ( $p$ -value  $< 0.001$ ) over the study  
47  
48 236 period after adjustment. Among only residents who were prevalent opioid users, this represented a  
49  
50 237 43.3% reduction in the proportion of residents also prescribed a benzodiazepine (30.6% in 2009/10  
51  
52 238 vs. 17.4% in 2016/17).

### 52 239 **Trends in opioid prescribing by LTC resident characteristics**

53  
54 240 After adjustment, the percent increase in opioid prevalence over the study period was  
55  
56 241 significantly greater for residents  $> 85$  years (vs. residents  $\leq 85$  years;  $p$ -value = 0.003 for interaction),

1  
2  
3 242 residents with dementia (vs. residents without dementia; p-value <0.001 for interaction), frail  
4  
5 243 residents (vs. non-frail residents; p-value <0.001 for interaction), and residents assessed as having no  
6  
7 244 pain (vs. residents assessed as having pain; p-value <0.001 for interaction) (**Table 2**). While there  
8  
9 245 was a 39.2% increase in opioid prevalence in individuals with dementia over time, opioid prescribing  
10  
11 246 remained lower among those with dementia compared to those without (16.3% vs. 26.0% in  
12  
13 247 2016/17; **Figure 2a**). Opioid prevalence was higher among frail residents, and increased 38.3% over  
14  
15 248 the study period. Therefore, the gap in opioid prevalence between frail and non-frail residents  
16  
17 249 widened over time (**Figure 2b**). Across the study period, the prevalence of opioids decreased by  
18  
19 250 3.8% among residents newly entering LTC compared to a 42.1% increase among on-going residents  
20  
21 251 (p-value <0.001 for interaction).

252

## 253 INTERPRETATION

254 Opioid prescribing patterns in Ontario LTC residents have changed significantly over the  
255 eight year study period, with the most notable change being a shift towards the use of  
256 hydromorphone, and an increase over time in the prevalence of opioid dispensations in older, more  
257 frail, more cognitively impaired residents, and in those who are assessed as having no pain.. These  
258 changes remained significant even after adjustment for the changing demographics of LTC residents  
259 over time. Overall, there was an increase in the prescribing of opioid therapy in LTC with a point  
260 prevalence of 19.6% of LTC residents in 2016/17. This increase in opioid prevalence was not  
261 attributable to opioid users in the community being newly admitted into LTC facilities and is in line  
262 with recent point prevalence estimates of opioid use in LTC in Finland (22%; (30)) and Norway  
263 (23%; (31)).

264 In keeping with guideline-recommended practices for safer prescribing, prescriptions  
265 exceeding dose guidelines and the co-prescribing of benzodiazepines with opioids decreased  
266 significantly over the study period. Another observed change over time was a decrease in the use of  
267 codeine. Guidelines caution against codeine for several reasons, including the potential for reduced  
268 effectiveness due to genetic polymorphisms or drug interactions in the CYP2D6 pathway.  
269 Hydromorphone and oxycodone have been specifically named in Canadian prescribing guidelines as  
270 preferred agents for managing pain in older adults.(16) The observed increasing preference for  
271 hydromorphone, and the decrease in oxycodone prescribing in LTC, are also both in keeping with  
272 trends across Ontario more broadly after drug reimbursement changes were put in place in 2012 to  
273 address the misuse of controlled release oxycodone.(24) At present, it is difficult to estimate the



1  
2  
3 274 impact of policy changes designed to address the wider crisis of non-medical opioid use and opioid-  
4  
5 275 related adverse events in the community on LTC opioid prescribing. However, it is important to  
6  
7 276 note that concerns regarding opioid misuse may be less relevant in the LTC setting, in which  
8  
9 277 medication administration is medically supervised.

10 278 A majority of residents of LTC in Ontario have cognitive impairment, and there is a lack of  
11  
12 279 evidence-based guidance for appropriate pain management in this population.(32) Our findings are  
13  
14 280 consistent with previous studies, finding a gap in opioid prescribing between those with and without  
15  
16 281 dementia.(33, 34) Challenges in the management of pain in dementia arise out of changes in pain  
17  
18 282 processing, perception and communication in dementia, and difficulties in assessing pain by  
19  
20 283 observation, with misinterpretation of pain-related behaviours.(33) For example, poorly managed  
21  
22 284 pain may manifest as agitation or depression. There is evidence of benefit for the empiric step-wise  
23  
24 285 treatment of pain in LTC residents with dementia and agitation, starting with acetaminophen and  
25  
26 286 proceeding to low-dose opioids.(35) However, a recent clinical trial found poor tolerability and lack  
27  
28 287 of efficacy of buprenorphine for the treatment of depression in dementia.(36, 37)

29 288 Although Canadian guidelines address the issue of age in opioid prescribing, they do not  
30  
31 289 specifically address frailty as a prescribing consideration. Frail older adults are at increased risk of  
32  
33 290 adverse events such as falls, fractures, delirium, and cognitive impairment,(26, 27, 38) but these risks  
34  
35 291 need to be balanced with appropriate pain management. Unfortunately there is a paucity of evidence  
36  
37 292 to guide the safe and effective prescribing of opioid therapies for pain in frail older adults. There  
38  
39 293 remains a difficult balance between advocating for caution in the use and dosing of these therapies,  
40  
41 294 and advocating for appropriate pain management. From our results, we are unable to determine if  
42  
43 295 the higher rates of prescribing in frail LTC residents is related to the degree of comorbidity and  
44  
45 296 medical complexity of this population, or is an indicator of potentially inappropriate prescribing.

#### 42 297 **Limitations**

43  
44 298 In our analysis, we were unable to examine trends in possible under- or over-treatment of  
45  
46 299 pain given the clinical and methodological challenges of measuring pain in this setting,(3, 39, 40) and  
47  
48 300 without assessing any alternative non-opioid drug and non-drug pain management strategies that  
49  
50 301 may be available to LTC residents. These factors, and the fact that pain is modified by opiate use,  
51  
52 302 also contribute to difficulty in the interpretation of the pain-stratified analysis. Another limitation of  
53  
54 303 this study is that there are a small number of opioid drugs and formulations which are not covered  
55  
56 304 by the ODB program, namely buprenorphine and tramadol. From clinical experience, we know that

1  
2  
3 305 these are rarely prescribed as the uninsured drug costs are prohibitive to families, and their use is  
4  
5 306 unlikely to have an impact on our results.

6  
7 307 **Conclusion**

8 308 While the prevalence of opioid prescribing is increasing in LTC in Ontario with a large shift  
9  
10 309 towards using hydromorphone, the declining use of high-dose opioids and benzodiazepine co-  
11  
12 310 prescription is in line with Canadian guidelines for older adults. There remains an opportunity to  
13  
14 311 address the prescribing gap among those with and without dementia and to better understand the  
15  
16 312 appropriateness of treatment patterns among frail residents. Future studies should examine the  
17  
18 313 impact of increased opioid prescribing on pain-related outcomes and on adverse events in the LTC  
19  
20 314 population.

21  
22 315

23 316

24 317

25 318

26 319

27 320

28 321

29 322

30 323

31 324

32 325

33 326

34 327

35 328

36 329

37 330

38 331

39 332

40 333

41 334

42 335

43 336

44 337

45 338

46 339

47 340

48 341

49 342

50 343

51 344

52

53

54

55

56

57

58

59

60

Confidential

1  
2  
3 345 **REFERENCES**

- 4 346
- 5 347 1. Won AB, Lapane KL, Vallow S, Schein J, Morris JN, Lipsitz LA. Persistent nonmalignant  
6 348 pain and analgesic prescribing patterns in elderly nursing home residents. *J Am Geriatr Soc.*  
7 349 2004;52(6):867-74.
- 8 350 2. Lapane KL, Quilliam BJ, Chow W, Kim M. The association between pain and measures of  
9 351 well-being among nursing home residents. *J Am Med Dir Assoc.* 2012;13(4):344-9.
- 10 352 3. Barry HE, Parsons C, Passmore AP, Hughes CM. Pain in care home residents with  
11 353 dementia: an exploration of frequency, prescribing and relatives' perspectives. *Int J Geriatr*  
12 354 *Psychiatry.* 2015;30(1):55-63.
- 13 355 4. Fain KM, Alexander GC, Dore DD, Segal JB, Zullo AR, Castillo-Salgado C. Frequency and  
14 356 Predictors of Analgesic Prescribing in U.S. Nursing Home Residents with Persistent Pain. *J Am*  
15 357 *Geriatr Soc.* 2017;65(2):286-93.
- 16 358 5. Griffioen C, Husebo BS, Flo E, Caljouw MAA, Achterberg WP. Opioid Prescription Use in  
17 359 Nursing Home Residents with Advanced Dementia. *Pain Med.* 2017.
- 18 360 6. McLachlan AJ, Bath S, Naganathan V, Hilmer SN, Le Couteur DG, Gibson SJ, et al. Clinical  
19 361 pharmacology of analgesic medicines in older people: impact of frailty and cognitive impairment. *Br*  
20 362 *J Clin Pharmacol.* 2011;71(3):351-64.
- 21 363 7. Daoust R, Paquet J, Moore L, Emond M, Gosselin S, Lavigne G, et al. Recent opioid use  
22 364 and fall-related injury among older patients with trauma. *Cmaj.* 2018;190(16):E500-e6.
- 23 365 8. Cepeda MS, Farrar JT, Baumgarten M, Boston R, Carr DB, Strom BL. Side effects of  
24 366 opioids during short-term administration: effect of age, gender, and race. *Clin Pharmacol Ther.*  
25 367 2003;74(2):102-12.
- 26 368 9. Sun EC, Dixit A, Humphreys K, Darnall BD, Baker LC, Mackey S. Association between  
27 369 concurrent use of prescription opioids and benzodiazepines and overdose: retrospective analysis.  
28 370 *Bmj.* 2017;356:j760.
- 29 371 10. Jann M, Kennedy WK, Lopez G. Benzodiazepines: a major component in unintentional  
30 372 prescription drug overdoses with opioid analgesics. *J Pharm Pract.* 2014;27(1):5-16.
- 31 373 11. The management of persistent pain in older persons. *J Am Geriatr Soc.* 2002;50(6  
32 374 Suppl):S205-24.
- 33 375 12. Gomes T, Pasricha S, Martins D, Greaves S, Tadrous M, Bandola D, et al. Behind the  
34 376 Prescriptions: A snapshot of opioid use across all Ontarians. Toronto: Ontario Drug Policy  
35 377 Research Network; 2017.
- 36 378 13. La Frenais FL, Bedder R, Vickerstaff V, Stone P, Sampson EL. Temporal Trends in  
37 379 Analgesic Use in Long-Term Care Facilities: A Systematic Review of International Prescribing. *J Am*  
38 380 *Geriatr Soc.* 2018;66(2):376-82.
- 39 381 14. Registered Nurses' Association of Ontario. Assessment and Management of Pain (3rd ed.).  
40 382 Toronto, ON; 2013.
- 41 383 15. Hadjistavropoulos T, Fitzgerald TD, Marchildon GP. Practice guidelines for assessing pain  
42 384 in older persons with dementia residing in long-term care facilities. *Physiother Can.* 2010;62(2):104-  
43 385 13.
- 44 386 16. Kahan M, Wilson L, Mailis-Gagnon A, Srivastava A. Canadian guideline for safe and  
45 387 effective use of opioids for chronic noncancer pain - Clinical summary for family physicians. Part 2:  
46 388 Special populations. *Canadian Family Physician.* 2011;57(11):1269-76.
- 47 389 17. Dowell D, Haegerich TM, Chou R. CDC Guideline for Prescribing Opioids for Chronic  
48 390 Pain. *MMWR Recomm Rep.* 2016;65(RR-1):1-49.
- 49  
50  
51  
52  
53  
54  
55  
56  
57  
58  
59  
60

- 1  
2  
3 391 18. Gomes T, Juurlink D, Yao Z, Camacho X, Paterson JM, Singh S, et al. Impact of legislation  
4 392 and a prescription monitoring program on the prevalence of potentially inappropriate prescriptions  
5 393 for monitored drugs in Ontario: a time series analysis. *CMAJ Open*. 2014;2(4):E256-61.
- 6 394 19. Iaboni A, Bronskill SE, Reynolds KB, Wang X, Rochon PA, Herrmann N, et al. Changing  
7 395 Pattern of Sedative Use in Older Adults: A Population-Based Cohort Study. *Drugs Aging*.  
8 396 2016;33(7):523-33.
- 9 397 20. Campitelli MA, Maxwell CJ, Giannakeas V, Bell CM, Daneman N, Jeffs L, et al. The  
10 398 Variation of Statin Use Among Nursing Home Residents and Physicians: A Cross-Sectional  
11 399 Analysis. *J Am Geriatr Soc*. 2017;65(9):2044-51.
- 12 400 21. Daneman N, Campitelli MA, Giannakeas V, Morris AM, Bell CM, Maxwell CJ, et al.  
13 401 Influences on the start, selection and duration of treatment with antibiotics in long-term care  
14 402 facilities. *Cmaj*. 2017;189(25):E851-e60.
- 15 403 22. Maclagan LC, Bronskill SE, Guan J, Campitelli MA, Herrmann N, Lapane KL, et al.  
16 404 Predictors of Cholinesterase Discontinuation during the First Year after Nursing Home Admission.  
17 405 *J Am Med Dir Assoc*. 2018;19(11):959-66.e4.
- 18 406 23. Hirdes JP, Poss JW, Caldarelli H, Fries BE, Morris JN, Teare GF, et al. An evaluation of  
19 407 data quality in Canada's Continuing Care Reporting System (CCRS): secondary analyses of Ontario  
20 408 data submitted between 1996 and 2011. *BMC Med Inform Decis Mak*. 2013;13:27.
- 21 409 24. Gomes T, Mastorakos A, Paterson JM, Sketris I, Caetano P, Greaves S, et al. Changes in the  
22 410 dispensing of opioid medications in Canada following the introduction of a tamper-deterrent  
23 411 formulation of long-acting oxycodone: a time series analysis. *CMAJ Open*. 2017;5(4):E800-e7.
- 24 412 25. Lix LM, Yan L, Blackburn D, Hu N, Schneider-Lindner V, Teare GF. Validity of the RAI-  
25 413 MDS for ascertaining diabetes and comorbid conditions in long-term care facility residents. *BMC*  
26 414 *Health Serv Res*. 2014;14:17.
- 27 415 26. Campitelli MA, Bronskill SE, Hogan DB, Diong C, Amuah JE, Gill S, et al. The prevalence  
28 416 and health consequences of frailty in a population-based older home care cohort: a comparison of  
29 417 different measures. *BMC Geriatr*. 2016;16:133.
- 30 418 27. Maclagan LC, Maxwell CJ, Gandhi S, Guan J, Bell CM, Hogan DB, et al. Frailty and  
31 419 Potentially Inappropriate Medication Use at Nursing Home Transition. *J Am Geriatr Soc*.  
32 420 2017;65(10):2205-12.
- 33 421 28. Hogan DB, Freiheit EA, Strain LA, Patten SB, Schmaltz HN, Rolfson D, et al. Comparing  
34 422 frailty measures in their ability to predict adverse outcome among older residents of assisted living.  
35 423 *BMC Geriatr*. 2012;12:56.
- 36 424 29. Lipsitz SR, Kim K, Zhao L. Analysis of repeated categorical data using generalized  
37 425 estimating equations. *Stat Med*. 1994;13(11):1149-63.
- 38 426 30. Pitkala KH, Juola A-L, Hosia H, Teramura-Gronblad M, Soini H, Savikko N, et al. Eight-  
39 427 year trends in the use of opioids, other analgesics, and psychotropic medications among  
40 428 institutionalized older people in Finland. *J Am Med Dir Assoc*. 2015;16(11):973-8.
- 41 429 31. Sandvik R, Selbaek G, Kirkevold O, Aarsland D, Husebo BS. Analgesic prescribing patterns  
42 430 in Norwegian nursing homes from 2000 to 2011: trend analyses of four data samples. *Age Ageing*.  
43 431 2016;45(1):54-60.
- 44 432 32. Corbett A, Nunez KM, Smeaton E, Testad I, Thomas AJ, Closs SJ, et al. The landscape of  
45 433 pain management in people with dementia living in care homes: a mixed methods study. *Int J*  
46 434 *Geriatr Psychiatry*. 2016;31(12):1354-70.
- 47 435 33. Achterberg WP, Pieper MJ, van Dalen-Kok AH, De Waal MW, Husebo BS, Lautenbacher S,  
48 436 et al. Pain management in patients with dementia. *Clinical interventions in aging*. 2013;8:1471.
- 49  
50  
51  
52  
53  
54  
55  
56  
57  
58  
59  
60

- 1  
2  
3 437 34. CK Tan E, Jokanovic N, PH Koponen M, Thomas D, N Hilmer S, Simon Bell J. Prevalence  
4 438 of analgesic use and pain in people with and without dementia or cognitive impairment in aged care  
5 439 facilities: a systematic review and meta-analysis. *Current clinical pharmacology*. 2015;10(3):194-203.  
6 440 35. Husebo BS, Ballard C, Sandvik R, Nilsen OB, Aarsland D. Efficacy of treating pain to  
7 441 reduce behavioural disturbances in residents of nursing homes with dementia: cluster randomised  
8 442 clinical trial. *Bmj*. 2011;343:d4065.  
9 443 36. Erdal A, Flo E, Aarsland D, Selbaek G, Ballard C, Slettebo DD, et al. Tolerability of  
10 444 buprenorphine transdermal system in nursing home patients with advanced dementia: a randomized,  
11 445 placebo-controlled trial (DEP. PAIN. DEM). *Clinical interventions in aging*. 2018;13:935.  
12 446 37. Erdal A, Flo E, Aarsland D, Ballard C, Slettebo DD, Husebo BS. Efficacy and Safety of  
13 447 Analgesic Treatment for Depression in People with Advanced Dementia: Randomised, Multicentre,  
14 448 Double-Blind, Placebo-Controlled Trial (DEP. PAIN. DEM). *Drugs & aging*. 2018:1-14.  
15 449 38. Fried LP, Tangen CM, Walston J, Newman AB, Hirsch C, Gottdiener J, et al. Frailty in older  
16 450 adults: evidence for a phenotype. *The Journals of Gerontology Series A: Biological Sciences and*  
17 451 *Medical Sciences*. 2001;56(3):M146-M57.  
18 452 39. Wu N, Miller SC, Lapane K, Roy J, Mor V. The quality of the quality indicator of pain  
19 453 derived from the minimum data set. *Health Serv Res*. 2005;40(4):1197-216.  
20 454 40. Cadogan MP, Schnelle JF, Yamamoto-Mitani N, Cabrera G, Simmons SF. A minimum data  
21 455 set prevalence of pain quality indicator: is it accurate and does it reflect differences in care processes?  
22 456 *J Gerontol A Biol Sci Med Sci*. 2004;59(3):281-5.

457

1  
2  
3  
4  
5  
6  
7  
8  
9  
10  
11  
12  
13  
14  
15  
16  
17  
18  
19  
20  
21  
22  
23  
24  
25  
26  
27  
28  
29  
30  
31  
32  
33  
34  
35  
36  
37  
38  
39  
40  
41  
42  
43  
44  
45  
46  
47

**TABLES**

**Table 1 – Summary of opioid prescribing to Ontario LTC residents at start and end of the study period, study years 2009/10 and 2016/17**

| Opioid prescription on assessment date     | Percentage (%) of LTC residents |         | Unadjusted results          |         | Adjusted <sup>a</sup> results |         |
|--------------------------------------------|---------------------------------|---------|-----------------------------|---------|-------------------------------|---------|
|                                            | 2009/10                         | 2016/17 | Percent change <sup>b</sup> | P-value | Percent change <sup>b</sup>   | P-value |
| Any opioid                                 | 15.8                            | 19.6    | +23.8                       | <0.001  | +30.3                         | <0.001  |
| Opioid agent                               |                                 |         |                             |         |                               |         |
| Codeine                                    | 5.8                             | 4.1     | -29.1                       | <0.001  | -26.1                         | <0.001  |
| Hydromorphone                              | 3.7                             | 11.8    | +220.8                      | <0.001  | +235.6                        | <0.001  |
| Morphine                                   | 1.6                             | 1.2     | -21.9                       | <0.001  | -16.6                         | <0.001  |
| Fentanyl                                   | 3.4                             | 1.9     | -44.9                       | <0.001  | -39.8                         | <0.001  |
| Oxycodone                                  | 2.9                             | 1.7     | -41.0                       | <0.001  | -36.8                         | <0.001  |
| Opioid formulation                         |                                 |         |                             |         |                               |         |
| Long-acting                                | 7.1                             | 7.3     | +3.4                        | 0.065   | +13.1                         | <0.001  |
| Short-acting                               | 10.7                            | 14.6    | +37.2                       | <0.001  | +42.4                         | <0.001  |
| Opioid dose over 90 MMEs                   | 4.8                             | 3.6     | -25.3                       | <0.001  | -17.4                         | <0.001  |
| Opioids co-prescribed with benzodiazepines | 4.8                             | 3.4     | -29.8                       | <0.001  | -23.6                         | <0.001  |

Abbreviations: LTC = Long-Term Care; MME = Milligrams of Morphine Equivalents  
a – Adjusted for age, sex, frailty, dementia diagnosis, and LTC assessment type  
b – Percentage change from study year 2009/10 to study year 2016/17

**Table 2 – Proportion of Ontario LTC residents receiving any opioids at start and end of the study period stratified by resident characteristics, study years 2009/10 and 2016/17**

| Resident characteristic | Percentage (%) of LTC residents |         | Unadjusted results          |         | Adjusted <sup>a</sup> results |                             |         |                       |
|-------------------------|---------------------------------|---------|-----------------------------|---------|-------------------------------|-----------------------------|---------|-----------------------|
|                         | 2009/10                         | 2016/17 | Percent change <sup>b</sup> | P-value | P-value (interaction)         | Percent change <sup>b</sup> | P-value | P-value (interaction) |
| Age                     |                                 |         |                             |         | 0.017                         |                             |         | 0.003                 |
| ≤ 85 years              | 16.6                            | 20.2    | +22.4                       | <0.001  |                               | +27.3                       | <0.001  |                       |
| > 85 years              | 15.1                            | 19.1    | +26.2                       | <0.001  |                               | +33.6                       | <0.001  |                       |
| Sex                     |                                 |         |                             |         | 0.915                         |                             |         | 0.903                 |
| Female                  | 17.2                            | 21.3    | +24.2                       | <0.001  |                               | +30.4                       | <0.001  |                       |
| Male                    | 12.2                            | 15.4    | +25.8                       | <0.001  |                               | +30.0                       | <0.001  |                       |
| Dementia                |                                 |         |                             |         | <0.001                        |                             |         | <0.001                |
| No                      | 21.3                            | 26.0    | +21.8                       | <0.001  |                               | +21.9                       | <0.001  |                       |
| Yes                     | 11.8                            | 16.3    | +38.5                       | <0.001  |                               | +39.2                       | <0.001  |                       |
| Frail resident          |                                 |         |                             |         | <0.001                        |                             |         | <0.001                |
| No                      | 15.0                            | 16.7    | +11.5                       | <0.001  |                               | +18.9                       | <0.001  |                       |
| Yes                     | 16.6                            | 21.7    | +30.6                       | <0.001  |                               | +38.3                       | <0.001  |                       |
| Pain frequency          |                                 |         |                             |         | <0.001                        |                             |         | <0.001                |
| No pain                 | 6.9                             | 12.4    | +80.0                       | <0.001  |                               | +87.1                       | <0.001  |                       |
| Any pain                | 28.1                            | 35.3    | +25.6                       | <0.001  |                               | +31.6                       | <0.001  |                       |
| LTC assessment type     |                                 |         |                             |         | <0.001                        |                             |         | <0.001                |
| Entry assessments       | 16.6                            | 15.4    | -7.3                        | 0.001   |                               | -3.8                        | 0.091   |                       |
| On-going assessments    | 15.6                            | 21.3    | +36.8                       | <0.001  |                               | +42.1                       | <0.001  |                       |

Abbreviations: LTC = Long-Term Care

a – Adjusted for age, sex, frailty, dementia diagnosis, and LTC assessment type but excluding the stratifying variable

b – Percentage change from study year 2009/10 to study year 2016/17

1  
2  
3  
4  
5  
6  
7  
8  
9  
10  
11  
12  
13  
14  
15  
16  
17  
18  
19  
20  
21  
22  
23  
24  
25  
26  
27  
28  
29  
30  
31  
32  
33  
34  
35  
36  
37  
38  
39  
40  
41  
42  
43  
44  
45  
46  
47

**FIGURES**

**Figure 1 – Proportion of Ontario LTC residents receiving any opioid and specific opioid agents in each study year between 2009/10 and 2016/17**

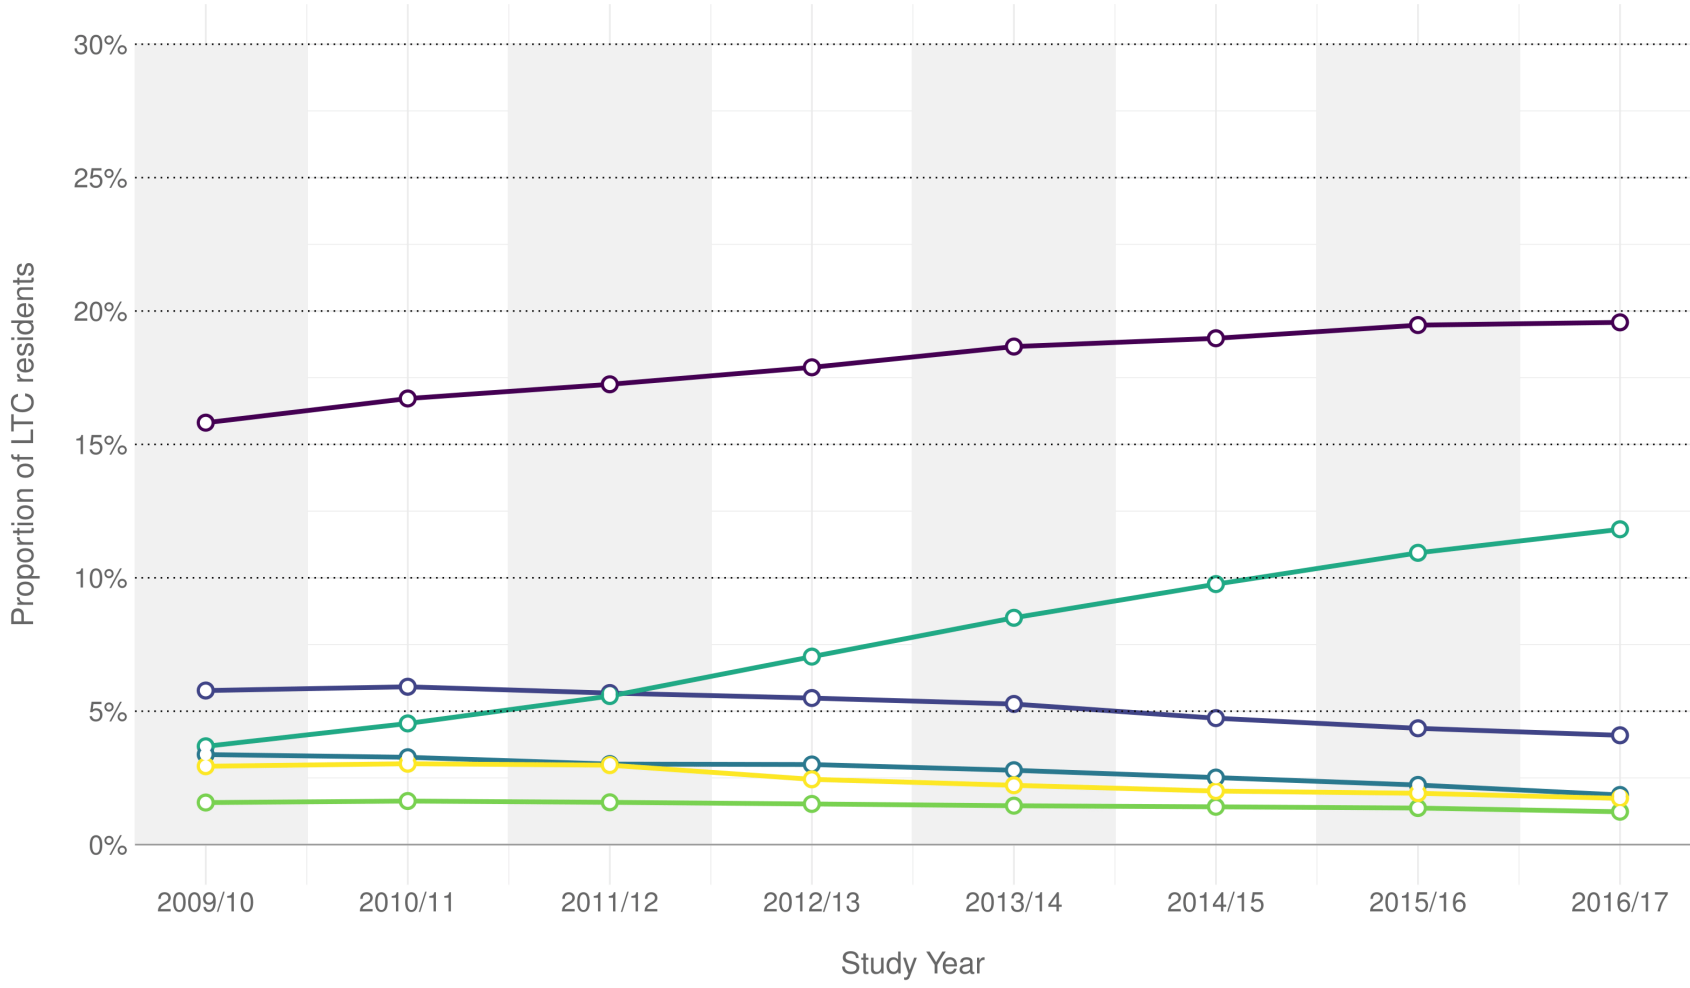

Any Opioid Codeine Fentanyl Hydromorphone Morphine Oxycodone



Figure 2 – Proportion of Ontario LTC residents, stratified by dementia diagnosis (A) and frailty (B), receiving any opioid in each study year between 2009/10 and 2016/17

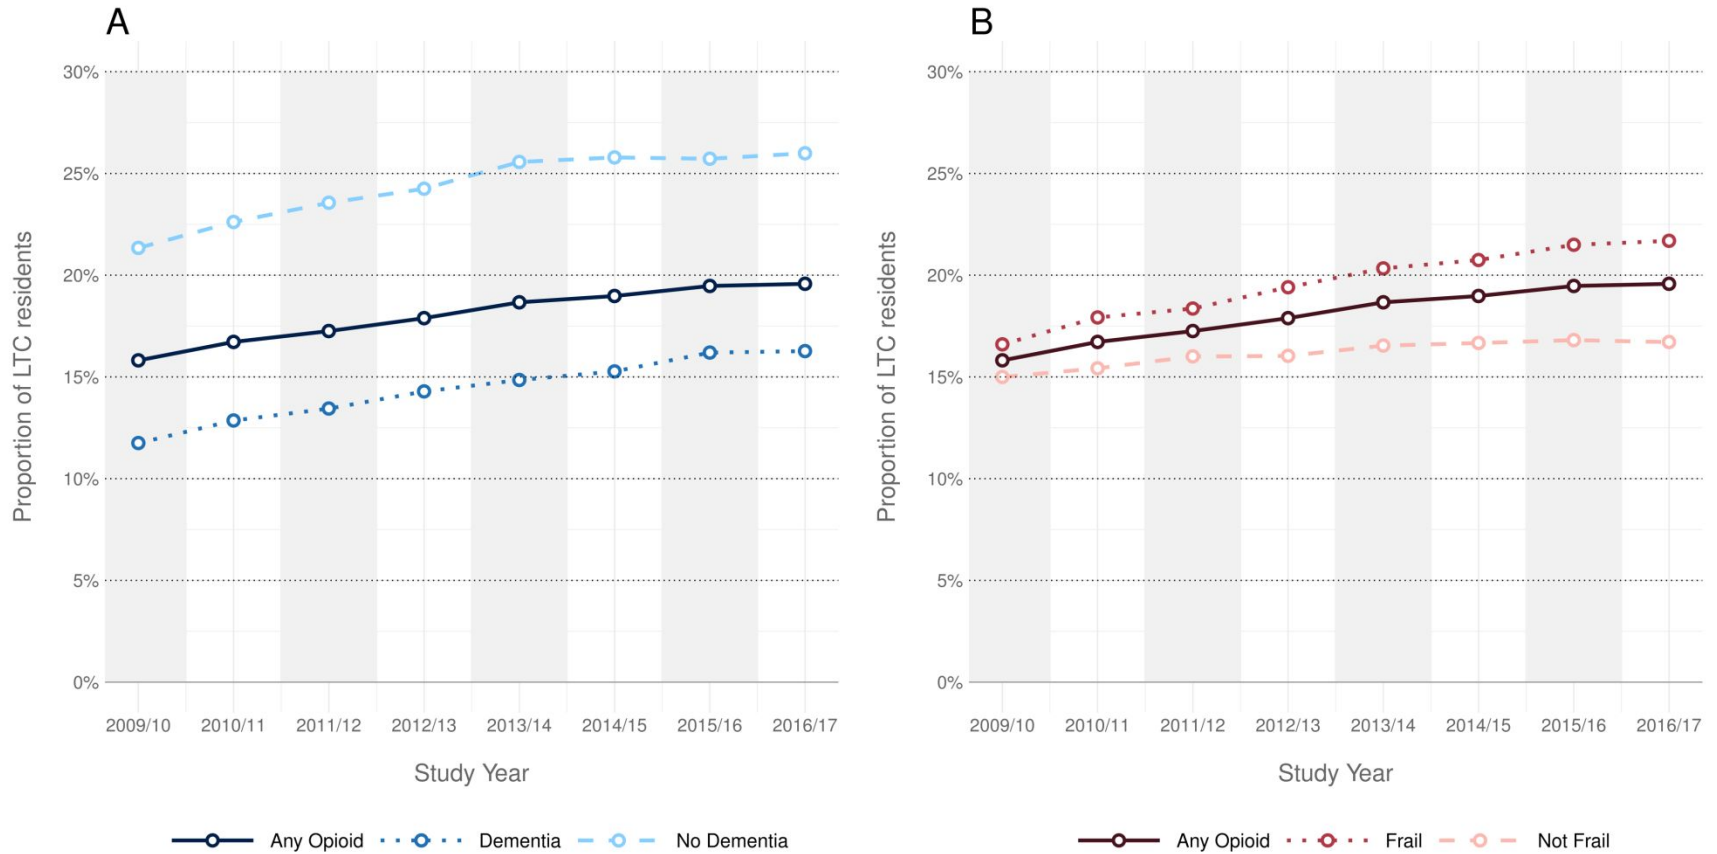

## ONLINE SUPPLEMENT

**eTable 1. Description of Ontario health administrative data sources included in this study**

| Database                                                            | Description                                                                                                                                                                                                                                                                                                                                                                                                                                                                                                                                                                         |
|---------------------------------------------------------------------|-------------------------------------------------------------------------------------------------------------------------------------------------------------------------------------------------------------------------------------------------------------------------------------------------------------------------------------------------------------------------------------------------------------------------------------------------------------------------------------------------------------------------------------------------------------------------------------|
| Continuing Care Reporting System Long-Term Care (CCRS-LTC) database | The CCRS-LTC database is comprised of mandatory, clinical assessments performed on all nursing home residents in Ontario. Nursing home assessments are made using the Resident Assessment Instrument Minimum Data Set (RAI-MDS) version 2.0, a previously validated tool. <sup>1,2</sup> Full assessments are completed on admission, annually, and following a significant health status change by trained medical personnel.                                                                                                                                                      |
| Ontario Drug Benefit (ODB) program database                         | The ODB database contains prescription medication claims for those covered under the provincial drug program, mainly those aged 65 years and older, nursing home residents, and those receiving social assistance. Each medication claim has an associated prescriber identifier which indicates the health practitioner who wrote the prescription. A special flag in the ODB database indicates whether the prescription was dispensed in the community or nursing home setting.                                                                                                  |
| Registered Persons Database (RPDB)                                  | An audit of 5,155 randomly selected prescriptions dispensed from 50 Ontario pharmacies determined that the ODB had an error rate of 0.7% and none of the pharmacy characteristics examined (locations, owner affiliation, productivity) were associated with coding errors. <sup>3</sup> The RPDB provides basic demographic information (age, sex, area of residence, date of birth, and date of death for deceased individuals) about anyone who has ever received an Ontario health card number (e.g., been enrolled in the province's publicly funded health insurance system). |

**References**

1. Kim H, Jung YI, Sung M, Lee JY, Yoon JY, Yoon JL: Reliability of the interRAI Long Term Care Facilities (LTFC) and interRAI Home Care (HC). *Geriatr Gerontol Int* 2015; 15: 220-8
2. Mor V: A comprehensive clinical assessment tool to inform policy and practice: applications of the minimum data set. *Med Care* 2004; 42: III50-III59
3. Levy AR, O'Brien BJ, Sellors C, Grootendorst P, Willison D: Coding accuracy of administrative drug claims in the Ontario Drug Benefit database. *Can J Clin Pharmacol* 2003; 10: 67-71

eTable 2. Opioid medications dispensed under Ontario's Drug Benefit program between April 1, 2009 and March 31, 2017

| Opioid Medication                        | Formulation              | Dosages   |
|------------------------------------------|--------------------------|-----------|
| <b>Codeine</b>                           |                          |           |
| Codeine Phosphate                        | Short-acting             | 5mg       |
|                                          |                          | 15mg      |
|                                          |                          | 25mg      |
|                                          |                          | 30mg      |
|                                          |                          | 60mg      |
| Codeine Phosphate + Acetaminophen        | Short-acting combination | 15mg      |
|                                          |                          | 30mg      |
|                                          |                          | 60mg      |
| Codeine Phosphate + Acetylsalicylic Acid | Short-acting combination | 15mg      |
|                                          |                          | 30mg      |
|                                          |                          | 60mg      |
| Codeine Sulfate                          | Long-acting              | 50mg      |
|                                          |                          | 100mg     |
|                                          |                          | 150mg     |
|                                          |                          | 200mg     |
| <b>Fentanyl</b>                          |                          |           |
| Fentanyl Citrate                         | Long-acting              | 25mcg/hr  |
|                                          |                          | 50mcg/hr  |
|                                          |                          | 75mcg/hr  |
|                                          |                          | 100mcg/hr |
| <b>Hydromorphone</b>                     |                          |           |
| Hydromorphone HCL                        | Short-acting             | 1mg       |
|                                          |                          | 2mg       |
|                                          |                          | 4mg       |
|                                          |                          | 8mg       |
|                                          |                          | 10mg      |
| Hydromorphone HCL                        | Long-acting              | 20mg      |
|                                          |                          | 50mg      |
|                                          |                          | 3mg       |
|                                          |                          | 4.5mg     |
|                                          |                          | 6mg       |
|                                          |                          | 9mg       |
|                                          |                          | 12mg      |
|                                          |                          | 18mg      |
| 24mg                                     |                          |           |
| 30mg                                     |                          |           |
| <b>Morphine</b>                          |                          |           |
| Morphine HCL                             | Short-acting             | 1mg       |
|                                          |                          | 5mg       |
|                                          |                          | 10mg      |
|                                          |                          | 20mg      |
|                                          |                          | 40mg      |
|                                          |                          | 50mg      |
| Morphine Sulfate                         | Short-acting             | 60mg      |
|                                          |                          | 1mg       |
|                                          |                          | 2mg       |
|                                          |                          | 5mg       |
|                                          |                          | 10mg      |
|                                          |                          | 15mg      |
|                                          |                          | 20mg      |
|                                          |                          | 25mg      |

1  
2  
3  
4  
5  
6  
7  
8  
9  
10  
11  
12  
13  
14  
15  
16  
17  
18  
19  
20  
21  
22  
23  
24  
25  
26  
27  
28  
29  
30  
31  
32  
33  
34  
35  
36  
37  
38  
39  
40  
41  
42  
43  
44  
45  
46  
47  
48  
49  
50  
51  
52  
53  
54  
55  
56  
57  
58  
59  
60

|                                      |                          |       |
|--------------------------------------|--------------------------|-------|
|                                      |                          | 30mg  |
|                                      |                          | 50mg  |
| Morphine Sulfate                     | Long-acting              | 10mg  |
|                                      |                          | 15mg  |
|                                      |                          | 20mg  |
|                                      |                          | 30mg  |
|                                      |                          | 50mg  |
|                                      |                          | 60mg  |
|                                      |                          | 100mg |
|                                      |                          | 200mg |
| <b>Oxycodone</b>                     |                          |       |
| Oxycodone HCL                        | Short-acting             | 5mg   |
|                                      |                          | 10mg  |
|                                      |                          | 20mg  |
| Oxycodone HCL + Acetaminophen        | Short-acting combination | 5mg   |
| Oxycodone HCL + Acetylsalicylic Acid | Short-acting combination | 5mg   |
| Oxycodone HCL                        | Long-acting              | 10mg  |
|                                      |                          | 15mg  |
|                                      |                          | 20mg  |
|                                      |                          | 30mg  |
|                                      |                          | 40mg  |
|                                      |                          | 60mg  |
|                                      |                          | 80mg  |
| <b>Other</b>                         |                          |       |
| Meperidine HCL                       | Short-acting             | 50mg  |
|                                      |                          | 75mg  |
|                                      |                          | 100mg |
| Methadone HCL <sup>a</sup>           |                          | 1mg   |
|                                      |                          | 5mg   |
|                                      |                          | 10mg  |
|                                      |                          | 25mg  |

---

Abbreviations: mg = milligrams; mcg/hr = micrograms per hour  
a - Prescribed for pain purposes

**eTable 3. Baseline characteristics of study population at each study year between 2009/10 and 2016/17**

| Resident<br>Characteristic | Study Year            |                       |                       |                       |                       |                       |                       |                       |
|----------------------------|-----------------------|-----------------------|-----------------------|-----------------------|-----------------------|-----------------------|-----------------------|-----------------------|
|                            | 2009/10<br>(N=74,371) | 2010/11<br>(N=76,084) | 2011/12<br>(N=76,080) | 2012/13<br>(N=76,320) | 2013/14<br>(N=76,252) | 2014/15<br>(N=77,304) | 2015/16<br>(N=76,512) | 2016/17<br>(N=76,254) |
| Age                        |                       |                       |                       |                       |                       |                       |                       |                       |
| ≤ 85 years                 | 38,276 (51.5%)        | 38,263 (50.3%)        | 37,754 (49.6%)        | 37,095 (48.6%)        | 36,543 (47.9%)        | 36,610 (47.4%)        | 36,034 (47.1%)        | 35,409 (46.4%)        |
| > 85 years                 | 36,095 (48.5%)        | 37,821 (49.7%)        | 38,326 (50.4%)        | 39,225 (51.4%)        | 39,709 (52.1%)        | 40,694 (52.6%)        | 40,478 (52.9%)        | 40,845 (53.6%)        |
| Sex                        |                       |                       |                       |                       |                       |                       |                       |                       |
| Female                     | 53,994 (72.6%)        | 54,974 (72.3%)        | 54,785 (72.0%)        | 54,657 (71.6%)        | 54,407 (71.4%)        | 54,887 (71.0%)        | 54,153 (70.8%)        | 53,838 (70.6%)        |
| Male                       | 20,377 (27.4%)        | 21,110 (27.7%)        | 21,295 (28.0%)        | 21,663 (28.4%)        | 21,845 (28.6%)        | 22,417 (29.0%)        | 22,359 (29.2%)        | 22,416 (29.4%)        |
| Dementia                   |                       |                       |                       |                       |                       |                       |                       |                       |
| No                         | 31,515 (42.4%)        | 30,105 (39.6%)        | 28,647 (37.7%)        | 27,602 (36.2%)        | 27,165 (35.6%)        | 27,242 (35.2%)        | 26,307 (34.4%)        | 25,915 (34.0%)        |
| Yes                        | 42,856 (57.6%)        | 45,979 (60.4%)        | 47,433 (62.3%)        | 48,718 (63.8%)        | 49,087 (64.4%)        | 50,062 (64.8%)        | 50,205 (65.6%)        | 50,339 (66.0%)        |
| Frail resident             |                       |                       |                       |                       |                       |                       |                       |                       |
| No                         | 36,524 (49.1%)        | 36,650 (48.2%)        | 35,833 (47.1%)        | 34,335 (45.0%)        | 33,506 (43.9%)        | 33,534 (43.4%)        | 33,021 (43.2%)        | 32,405 (42.5%)        |
| Yes                        | 37,847 (50.9%)        | 39,434 (51.8%)        | 40,247 (52.9%)        | 41,985 (55.0%)        | 42,746 (56.1%)        | 43,770 (56.6%)        | 43,491 (56.8%)        | 43,849 (57.5%)        |
| Pain Frequency             |                       |                       |                       |                       |                       |                       |                       |                       |
| No pain                    | 43,151 (58.0%)        | 44,803 (58.9%)        | 46,210 (60.7%)        | 48,069 (63.0%)        | 48,954 (64.2%)        | 50,770 (65.7%)        | 51,418 (67.2%)        | 52,485 (68.8%)        |
| Any pain                   | 31,220 (42.0%)        | 31,281 (41.1%)        | 29,870 (39.3%)        | 28,251 (37.0%)        | 27,298 (35.8%)        | 26,534 (34.3%)        | 25,094 (32.8%)        | 23,769 (31.2%)        |
| LTC<br>assessment type     |                       |                       |                       |                       |                       |                       |                       |                       |
| Entry                      | 17,041 (22.9%)        | 21,723 (28.6%)        | 21,741 (28.6%)        | 21,325 (27.9%)        | 22,148 (29.0%)        | 23,480 (30.4%)        | 22,556 (29.5%)        | 22,359 (29.3%)        |
| Follow-up                  | 57,330 (77.1%)        | 54,361 (71.4%)        | 54,339 (71.4%)        | 54,995 (72.1%)        | 54,104 (71.0%)        | 53,824 (69.6%)        | 53,956 (70.5%)        | 53,895 (70.7%)        |

Abbreviations: LTC = Long-Term Care
